# Supplementary material
Source: PubMed Central journal article supplement (PMC10842427)
Supplement: NIHMS1942570-supplement-Supplementary_Materials.pdf [file NIHMS1942570-supplement-Supplementary_Materials.pdf]

Supplementary Materials

DnaJs are enriched in tau regulators

Abigail R. Esquivel<sup>a,b</sup>, Shannon E. Hill<sup>a,b</sup>, Laura J. Blair<sup>a,b,c,\*</sup>

*<sup>a</sup>Department of Molecular Medicine, Morsani College of Medicine, University of South Florida, Tampa, FL 33612, USA*

*<sup>b</sup>USF Health Byrd Alzheimer's Institute, University of South Florida, Tampa, FL 33613, USA*

*<sup>c</sup>Research Service, James A Haley Veterans Hospital, Tampa, FL 33612, USA*

\*Corresponding Author

Email:

[laurablair@usf.edu](mailto:laurablair@usf.edu)

Address:

4001 E. Fletcher Ave.

MDC 36

Tampa, FL 33613

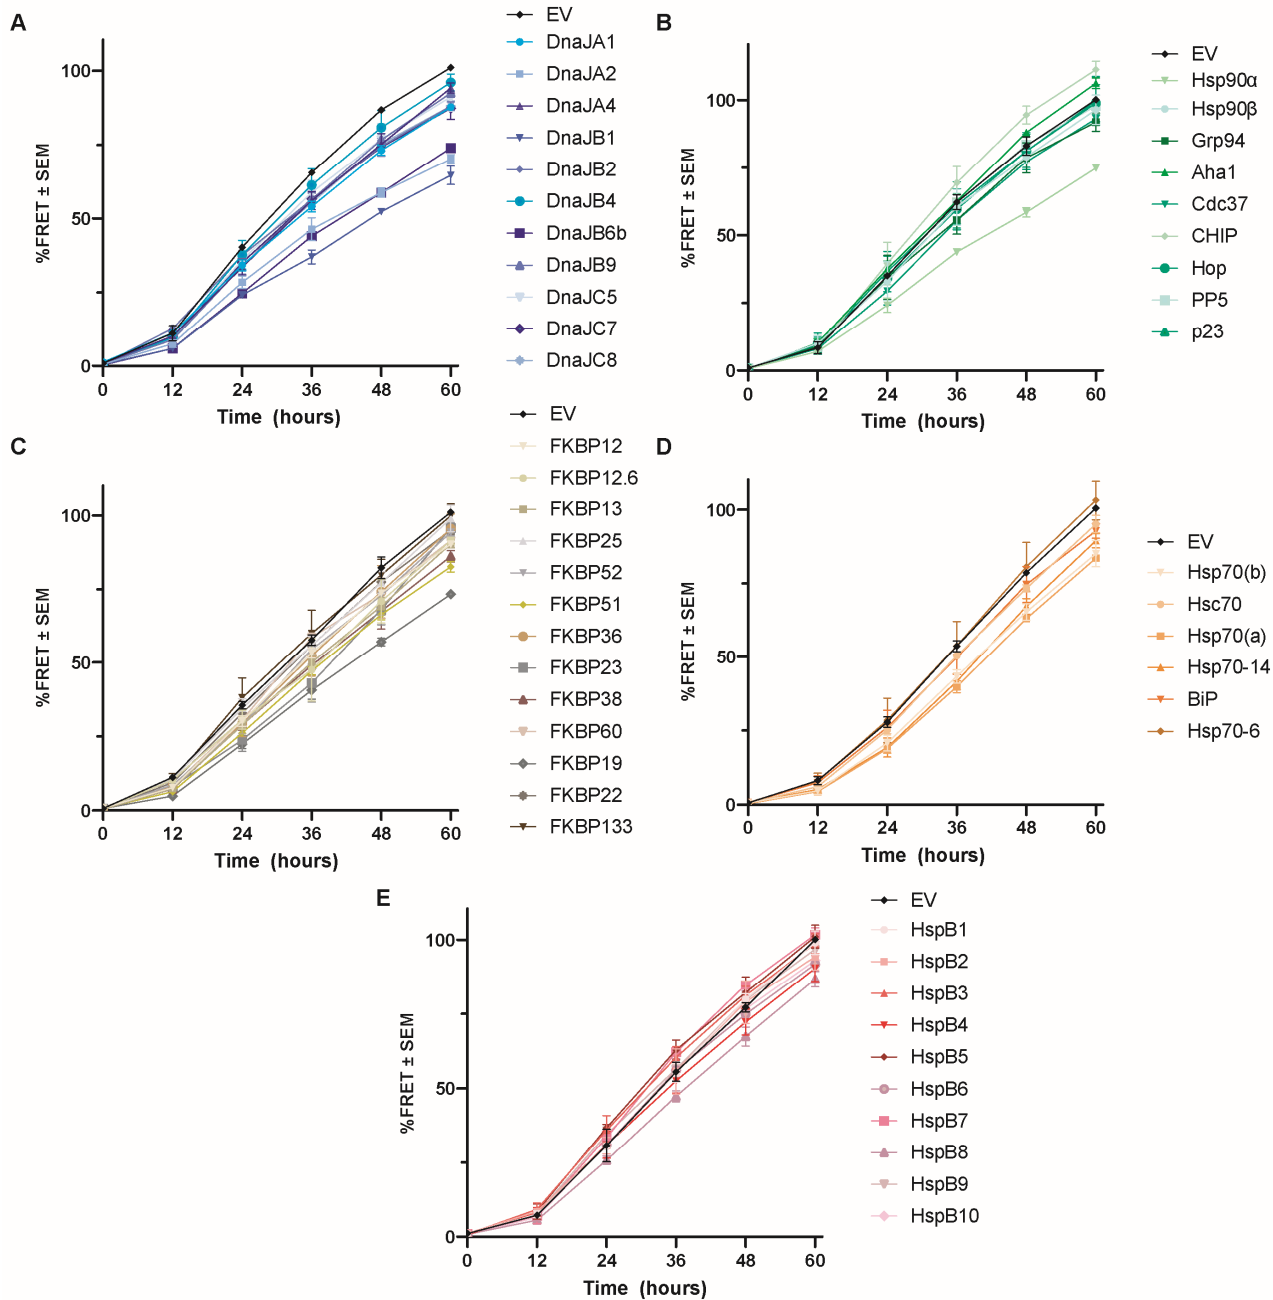

**Figure S1. Kinetic data from Tau RD P301S FRET biosensor screen.** A semi-high throughput Tau RD P301S FRET biosensor assay was used to screen 49 molecular chaperones from five chaperone families were screened for their effects on tau seeding. For each chaperone, FRET intensity within the total cell area at 60 hours was normalized to EV control to calculate the relative %FRET signal. Kinetic data show the average of 2 independent experiments as %FRET  $\pm$  S.E.M. for chaperone members of the (A) DnaJ family, (B) Hsp90 and Hsp90 cochaperone families, (C) FKBP family, (D) Hsp70 family, and (E) sHsp family compared to their EV control, respectively. Data analysis was performed by repeated measures ANOVA with a Greenhouse-Geisser correction over the course of the experiment across each family of chaperones, except for Hsp90 and Hsp90 cochaperones, which were combined. Within subjects ANOVA showed the DnaJ group [F(20.532,111.991)=3.415], FKBP group [F(24.705,133.028)=1.794], Hsp90 and Hsp90 cochaperone group [F(17.779,98.770)=6.090] and Hsp70 group [F(24.705,133.028)=1.794] were all significant on tau seeding. Within each group, Dunnett's post hoc test revealed individual chaperone members with significant effects on tau seeding in DnaJ (DnaJA2, DnaJB1 and DnaJB6b), Hsp90 and Hsp90 cochaperone (Hsp90 $\alpha$ ) and FKBP (FKBP19) groups. The 60-hour timepoint from these data are displayed as bar graphs in Figure 2 to display significance.

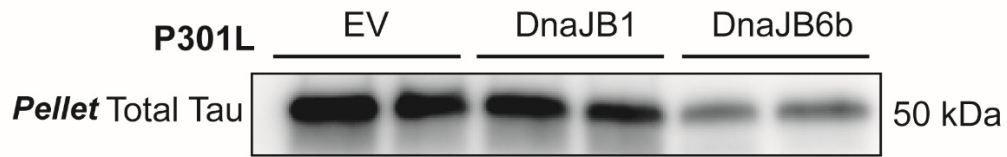

**Figure S2. DnaJB6b decreases tau recovered from the pellet.** Tau expression was induced by tetracycline for 48 hours in iHEK P301L, followed by transfection of DnaJB1, DnaJB6b, or EV for 48 hours prior to harvesting for analysis. Pellets were re-solublized and analyzed by western blot as shown.

**Table S1.** Summary of statistical analysis.

| <b>Figure</b>                               | <b>Type of Test</b>                                                                           | <b>Factor</b>                  | <b>Group</b>                      | <b>Statistical Value</b> | <b>P value</b> | <b>Post Hoc p&lt;0.05</b>        |
|---------------------------------------------|-----------------------------------------------------------------------------------------------|--------------------------------|-----------------------------------|--------------------------|----------------|----------------------------------|
| 2A-E<br>/S1                                 | Within Subjects<br>Repeated<br>measures<br>ANOVA with<br>Greenhouse-<br>Geisser<br>correction | Time<br>Elapsed x<br>Chaperone | DnaJ                              | F(20.532,111.991)=3.415  | 0.000          | DnaJA2, DnaJB1,<br>DnaJB6b       |
|                                             |                                                                                               |                                | FKBP                              | F(24.705,133.028)=1.794  | 0.019          | FKBP19                           |
|                                             |                                                                                               |                                | Hsp90 and<br>Hsp90<br>cochaperone | F(17.779,98.770)=6.090   | 0.000          | Hsp90a                           |
|                                             |                                                                                               |                                | Hsp70                             | F(24.705,133.028)=1.794  | 0.033          | None                             |
|                                             |                                                                                               |                                | sHsp                              | F(14.108,77.591)=1.103   | 0.369          | None                             |
| 3B                                          | One-way<br>ANOVA                                                                              | Chaperone                      | DnaJ                              | F(3,4)=240.9             | <0.001         | DnaJA2, DnaJB1,<br>DnaJB6b       |
| Hsp90,<br>Hsp90<br>cochaperone,<br>and FKBP |                                                                                               |                                | F(2,3)=17.52                      | <0.05                    | None           |                                  |
| 3B                                          |                                                                                               | Chaperone                      | DnaJ                              | F(3,4)=20.07             | <0.01          | DnaJB1 and<br>DnaJB6b            |
| 4B                                          |                                                                                               | Chaperone                      | iHEK P301L                        | F(2,9)=7.443             | <0.05          | DnaJB6b                          |
| 5B                                          |                                                                                               | Chaperone                      | iHEK WT                           | F(2,9)=19.97             | <0.001         | DnaJB6b                          |
| 5D                                          |                                                                                               | Chaperone                      | iHEK<br>$\Delta$ K280             | F(2,9)=12.05             | <0.05          | DnaJB6b                          |
| 5F                                          |                                                                                               | Chaperone                      | iHEK<br>$\Delta$ K280             | F(2,9)=12.05             | <0.05          | DnaJB6b                          |
| 6B                                          | Two-way<br>ANOVA                                                                              | Chaperone                      | Inhibitors                        | F (1, 8) = 32.46         | <0.05          | DnaJB6b DMSO and<br>DnaJB6b Leup |

**Table S2.** Summary of plasmids used in experiments.

| <b>Plasmid Name</b> | <b>Alternative Names</b>   | <b>Vector Backbone</b> | <b>Tags</b> | <b>Source or Reference</b>           |
|---------------------|----------------------------|------------------------|-------------|--------------------------------------|
| Hsp90 $\alpha$      | HSP90AA1                   | pCMV6                  | N-FLAG      | Dr. Leonard Neckers                  |
| Hsp90 $\beta$       | HSP90AB1                   | pCMV6                  | N-FLAG      | Dr. Leonard Neckers                  |
| Grp94               | HSP90B1                    | pCMV6                  |             | Generated by our lab                 |
| Hsp70               | HSPA1B/Hsp72               | pCMV6                  |             | [30]                                 |
| Hsc70               | HSPA8/Hsp73                | pCMV6                  |             | [30]                                 |
| BIP                 | HSPA5/Grp78                | pCMV KDEL              | C-Myc       | [100]                                |
| Hsp70 -14           | HSPA14                     | pCDNA5 FRT/TO/V5       |             | [101]                                |
| Hsp70 - 6           | HSPA6/HSP70B               | pCDNA5 FRT/TO/V5       |             | [101]                                |
| Hsp70               | HSPA1A/Hsp72               | pCDNA5 FRT/TO/V5       |             | [101]                                |
| p23                 | Prostaglandin E synthase 3 | pCMV6                  |             | [102]                                |
| Aha1                | AHSA1/p38                  | pCDNA 3.1              |             | [40]                                 |
| Cdc37               |                            | pCMV6                  |             | [102]                                |
| PP5                 | PPP5C                      | pCMV6-SPORT6           |             | Generated by our lab                 |
| CHIP                | STUB1                      | pCDNA3.1               |             | [103]                                |
| HOP                 | HOPX                       | pCMV6                  |             | Generated by our lab                 |
| DnaJA1              | HDJ2                       | pCMV6                  | N-FLAG      | [64]                                 |
| DnaJA2              |                            | pCMV6                  | N-FLAG      | Subcloned into pCMV6 from cDNA [101] |
| DnaJA4              |                            | pCMV6                  | N-FLAG      | Subcloned into pCMV6 from cDNA [101] |
| DnaJB1              | HDJ1                       | pCMV6                  | N-FLAG      | Subcloned into pCMV6 from cDNA [30]  |
| DnaJB2A             |                            | pCMV6                  | N-FLAG      | Subcloned into pCMV6 from cDNA [101] |
| DNAJB4              |                            | pCDNA5 FRT/TO/V5       |             | [101]                                |
| DnaJB6B             | MRJ                        | pCMV6                  | N-FLAG      | Subcloned into pCMV6 from cDNA [101] |
| DnaJB9              | MDG1/ERDj4                 | pCMV6                  | N-FLAG      | Subcloned into pCMV6 from cDNA [101] |
| DnaJC5              | CSP $\alpha$               | pCMV6                  | N-FLAG      | [30]                                 |
| DnaJC7              | TPR2                       | pCMV6                  |             | [30]                                 |
| DnaJC8              | SPF31                      | pCMV6                  | N-FLAG      | [30]                                 |
| FKBP12              | FKBP1A                     | pCMV6                  | N-FLAG      | Generated by our lab                 |
| FKBP12.6            | FKBP1B                     | pCMV6                  |             | Generated by our lab                 |
| FKBP13              | FKBP2                      | pCMV6                  | C-FLAG      | Generated by our lab                 |
| FKBP19              | FKBP11                     | pCMV6                  | C-FLAG      | Generated by our lab                 |
| FKBP22              | FKBP14                     | pCMV6                  |             | Generated by our lab                 |
| FKBP23              | FKBP7                      | pCMV6                  | C-FLAG      | Generated by our lab                 |
| FKBP25              | FKBP3                      | pCMV6                  | C-FLAG      | Generated by our lab                 |
| FKBP36              | FKBP6                      | pCMV6                  |             | Generated by our lab                 |
| FKBP38              | FKBP8                      | pCMV6                  |             | Generated by our lab                 |
| FKBP51              | FKBP5                      | pCMV6                  |             | [104]                                |

|                |                              |               |        |                      |
|----------------|------------------------------|---------------|--------|----------------------|
| FKBP52         | FKBP4                        | pCMV6         |        | [104]                |
| FKBP60         | FKBP9                        | pCMV6         | C-FLAG | Generated by our lab |
| FKBP133        | FKBP15                       | pCMV6         | C-FLAG | Generated by our lab |
| HspB1          | Hsp27                        | pCDNA5 FRT/TO |        | [105]                |
| HspB2          |                              | pCDNA5 FRT/TO |        | [105]                |
| HspB3          |                              | pCDNA5 FRT/TO |        | [105]                |
| HspB4          |                              | pCDNA5 FRT/TO |        | [105]                |
| HspB5          | CRYAB/ $\alpha$ B-crystallin | pCDNA5 FRT/TO |        | [105]                |
| HspB6          |                              | pCDNA5 FRT/TO |        | [105]                |
| HspB7          |                              | pCDNA5 FRT/TO |        | [105]                |
| HspB8          | Hsp22                        | pCDNA5 FRT/TO |        | [105]                |
| HspB9          |                              | pCDNA5 FRT/TO |        | [105]                |
| HspB10         |                              | pCDNA5 FRT/TO |        | [105]                |
| P301L 4R0N Tau |                              | pET-28a       | 6x His | Generated by our lab |
| P301L 4R0N Tau |                              | pCMV6         |        | Generated by our lab |
| empty vector   |                              | PCMV6         |        | Origene, #RC223397   |
| empty vector   |                              | PCMV6         | N-FLAG | Origene, #PCMV6XL6   |
| empty vector   |                              | pCDNA5 FRT/TO |        | Invitrogen #V6520-20 |

- [100] J. Shen, X. Chen, L. Hendershot, R. Prywes, ER stress regulation of ATF6 localization by dissociation of BiP/GRP78 binding and unmasking of golgi localization signals, *Developmental Cell* 3(1) (2002) 99-111.
- [101] J. Hageman, H.H. Kampinga, Computational analysis of the human HSPH/HSPA/DNAJ family and cloning of a human HSPH/HSPA/DNAJ expression library, *Cell Stress Chaperones* 14(1) (2009) 1-21.
- [102] U.K. Jinwal, J.H. Trotter, J.F. Abisambra, J. Koren, 3rd, L.Y. Lawson, G.D. Vestal, J.C. O'Leary, 3rd, A.G. Johnson, Y. Jin, J.R. Jones, Q. Li, E.J. Weeber, C.A. Dickey, The Hsp90 kinase co-chaperone Cdc37 regulates tau stability and phosphorylation dynamics, *J. Biol. Chem.* 286(19) (2011) 16976-83.
- [103] C.A. Dickey, A. Kamal, K. Lundgren, N. Klosak, R.M. Bailey, J. Dunmore, P. Ash, S. Shoraka, J. Zlatkovic, C.B. Eckman, C. Patterson, D.W. Dickson, N.S. Nahman, Jr., M. Hutton, F. Burrows, L. Petrucelli, The high-affinity HSP90-CHIP complex recognizes and selectively degrades phosphorylated tau client proteins, *J. Clin. Invest.* 117(3) (2007) 648-58.
- [104] U.K. Jinwal, J. Koren, 3rd, S.I. Borysov, A.B. Schmid, J.F. Abisambra, L.J. Blair, A.G. Johnson, J.R. Jones, C.L. Shults, J.C. O'Leary, 3rd, Y. Jin, J. Buchner, M.B. Cox, C.A. Dickey, The Hsp90 cochaperone, FKBP51, increases Tau stability and polymerizes microtubules, *J. Neurosci.* 30(2) (2010) 591-9.
- [105] M.J. Vos, M.P. Zijlstra, B. Kanon, M.A. van Waarde-Verhagen, E.R. Brunt, H.M. Oosterveld-Hut, S. Carra, O.C. Sibon, H.H. Kampinga, HSPB7 is the most potent polyQ aggregation suppressor within the HSPB family of molecular chaperones, *Hum. Mol. Genet.* 19(23) (2010) 4677-93.
